# Supplementary material
Source: PubMed Central journal article supplement (PMC4612494)
Supplement: NIHMS696431-supplement-Supplemental_4.pdf [file NIHMS696431-supplement-Supplemental_4.pdf]

# MNeighborGen

Version 1.4.2 04/15/2011 (Linux)

## Usage

`mneighborgen`

`-h` -Prints this message.

`-v` -Prints MNeighborGen version.

`mneighborgen -d<DataDir> -s<ScoringMatrix> -t<Threshold>`

`-d <DataDir>` -Use DataDir for MNeighborGen (MblastX) internal files.

Default -use \$MBLASTX\_DATADIR environment setting or current directory.

This argument overrides MBLASTX\_DATADIR environment variable.

`-s<ScoringMatrix>` -Matrix used for word score. Default matrix is BLOSUM62.

`-t<Threshold>` -Threshold(Minimum Word Score) value to use. Default is 26.

## Known Limitations

None.

## Examples

1. With no parameters

`mneighborgen`

With no parameters, creates the Neighborhood file *BLOSUM62\_6\_26.dat* in the current directory. In case the MBLASTX\_DATADIR environment variable is set, the file is created in the directory pointed to by this environment variable.

2. Specifying the data directory for MblastX

`mneighborgen -d /home/mblastx/data`

With the `-d` parameter, the neighborhood file is created in the specified directory. This is irrespective of the setting for the MBLASTX\_DATADIR environment variable. In the above example, the file *BLOSUM62\_6\_26.dat* is created in the directory */home/mblastx/data*.

3. Overriding the default Scoring Matrix

`mneighborgen -s PAM250`

With the `-s` parameter, the neighborhood file is generated using the specified matrix, rather than the default BLOSUM62. In the above example, the PAM250 matrix is used instead of the default and the output file created would be *PAM250\_6\_26.dat*. Valid values for matrix are 'BLOSUM45', 'BLOSUM50', 'BLOSUM62', 'BLOSUM80', 'BLOSUM90', 'PAM250', 'PAM30' and 'PAM70'.

4. Overriding the default threshold

`mneighborgen -t 30`

With the `-t` parameter, the neighborhood file is generated using the specified Word Threshold value, instead of the default 26. In the above example, Word Threshold of 30 is used instead of 26 and the corresponding neighborhood file created would be *BLOSUM62\_6\_30.dat*.
